# Supplementary material
Source: HighWire-hosted journal article supplement (https://jnis.bmj.com/content/neurintsurg-2018-014270)
Supplement: inline-supplementary-material-1 [file inline-supplementary-material-1.docx]

Acknowledgements
Executive committee
Diederik W.J. Dippel1;Aad van der Lugt2;Charles B.L.M. Majoie3;Yvo B.W.E.M. Roos4;Robert J. van Oostenbrugge5;Wim H. van Zwam6;Jelis Boiten14;Jan Albert Vos8
Study coordinators
Ivo G.H. Jansen3;Maxim J.H.L. Mulder1,2;Robert- Jan B. Goldhoorn5,6
Local principal investigators
Wouter J. Schonewille7;Jan Albert Vos8;Charles B.L.M. Majoie3;Jonathan Coutinho4;Marieke J.H. Wermer9;Marianne A.A. van Walderveen10;Julie Staals5;Wim H. van Zwam6;Jeannette Hofmeijer11;Jasper Martens12;Geert J. Lycklama à Nijeholt13;Jelis Boiten14;Bob Roozenbeek1;Bart J. Emmer2;Sebastiaan F. de Bruijn15;Lukas C. van Dijk16;H. Bart van der Worp17 ;Rob H. Lo18;Ewoud J. van Dijk19;Jeroen Boogaarts20;Paul L.M. de Kort21;Jo Peluso26;Jan S.P. van den Berg22;Boudewijn A.A.M. van Hasselt23;Leo A.M. Aerden24;René J. Dallinga25;Maarten Uyttenboogaart28;Omid Eshghi29;Tobien H.C.M.L. Schreuder30;Roel J.J. Heijboer31;Koos Keizer32;Lonneke Yo33;Heleen M. den Hertog34;Emiel J.C. Sturm35
Imaging assessment committee
Charles B.L.M. Majoie3(chair);Wim H. van Zwam6;Aad van der Lugt2;Geert J. Lycklama à Nijeholt13;Marianne A.A. van Walderveen10;Marieke E.S. Sprengers3;Sjoerd F.M. Jenniskens27;René van den Berg3;Albert J. Yoo37;Ludo Beenen3;Stefan Roosendaal3;Bas van der Kallen13;Ido van den Wijngaard13;Ad van Es2;Bart Emmer2,3;Jasper Martens12; Lonneke Yo33;Jan Albert Vos8;Joost Bot36;Pieter-Jan van Doormaal2;Alida Postma6.
Writing committee
Diederik W.J. Dippel1;Aad van der Lugt2;Charles B.L.M. Majoie3;Yvo B.W.E.M. Roos4;Robert J. van Oostenbrugge5;Wim H. van Zwam6;Geert J. Lycklama à Nijeholt13;Jelis Boiten14;Jan Albert Vos8;Wouter J. Schonewille7;Jeannette Hofmeijer11;Jasper Martens12;H. Bart van der Worp17;Rob H. Lo18
Adverse event committee
Robert J. van Oostenbrugge5;Jeannette Hofmeijer11;H. Zwenneke Flach23
Trial methodologist
Hester F. Lingsma38
Research nurses / local trial coordinators
Naziha el Ghannouti1;Martin Sterrenberg1;Corina Puppels7;Wilma Pellikaan7;Rita Sprengers3;Marjan Elfrink11;Joke de Meris14;Tamara Vermeulen14;Annet Geerlings19;Gina van Vemde22;Tiny Simons30;Cathelijn van Rijswijk21;Gert Messchendorp28;Hester Bongenaar32;Karin Bodde24;Sandra Kleijn34;Jasmijn Lodico34; Hanneke Droste34;M. Wollaert5;D. Jeurrissen5;Ernas Bos9;Yvonne Drabbe15;Marjan Elfrink11;Berber Zweedijk17 ; Mostafa Khalilzada15.
PhD / Medical students:
Ralph Geuskens3;Tim van Straaten19;Saliha Ergezen1;Roger R.M. Harmsma1;Daan Muijres1; Anouk de Jong1;Wouter Hinseveld7;Olvert A. Berkhemer1,3,6;Marieke A. Mens3;Katinka R. van Kranendonk3;Kilian M. Treurniet3;Manon Kappelhof3;Manon L. Tolhuijsen3;Heitor Alves3.
List of affiliations
Department of Neurology1,Radiology2,Public Health38,Erasmus MC University Medical Centre; Department of Radiology3,Neurology4, Academic Medical Centre, Amsterdam; Department of Neurology5, Radiology6, Maastricht University Medical Centre and Cardiovascular
Research Institute Maastricht (CARIM);
Department of Neurology7, Radiology8, Sint Antonius Hospital, Nieuwegein; Department of Neurology9,Radiology10,Leiden University Medical Centre; Department of Neurology11, Radiology12,Rijnstate Hospital, Arnhem; Department of Radiology13,Neurology14,MC Haaglanden, the Hague; Department of Neurology15,Radiology16,HAGA Hospital, the Hague; Department of Neurology17,Radiology18,University Medical Centre Utrecht; Department of Neurology19,Neurosurgery20,Radiology27,Radboud University Medical Centre, Nijmegen;
Department of Neurology21,Radiology26,Sint Elisabeth Hospital, Tilburg; Department of Neurology22,Radiology23,Isala Klinieken, Zwolle; Department of Neurology24,Radiology25,Reinier de Graaf Gasthuis, Delft; Department of Neurology28,Radiology29,University Medical Centre Groningen; Department of Neurology30,Radiology31,Atrium Medical Centre, Heerlen; Department of Neurology32,Radiology33,Catharina Hospital, Eindhoven; Department of Neurology34,Radiology35,Medical Spectrum Twente, Enschede;
Department of Radiology36,VUMC, Amsterdam; Department of Radiology37,Texas Stroke Institute, Texas, United States of America;
Disclosures
Institutional disclosures
Erasmus MC received funds from Stryker® by DD, AvdL, and Bracco Imaging® by DD. AMC received funds from Stryker® for consultations by CM, YR and OB. MUMC received funds from Stryker® and Codman® for consultations by WZ.
Personal disclosures
None reported.
Medical ethic committee statement
The MR CLEAN Registry was approved by the ethics committee of the Erasmus University MC, Rotterdam, The Netherlands (MEC-2014-235). With this approval it was approved by the research board of each participating centre. At UMC Utrecht, approval to participate in the study has been obtained from their own ethics committee.
Contributorship Statement

The following are members of the MR CLEAN Registry :
Ivo G H Jansen, medical researcher, Maxim J H L Mulder, medical researcher, Robert-Jan B Goldhoorn, medical researcher, Bart J Emmer, interventional radiologist, Adriaan C G M van Es, interventional radiologist, Bob Roozenbeek, neurologist, Wouter J Schonewille, neurologist, René van den Berg, interventional radiologist, Jonathan M Coutinho, neurologist, Julie Staals, neurologist, Alida A Postma, interventional radiologist, Geert J Lycklama à Nijeholt, interventional radiologist, Jeannette Hofmeijer, neurologist, Jasper M Martens, interventional radiologist, Heleen M den Hertog, neurologist, Emiel J C Sturm, interventional radiologist, H Bart van der Worp, neurologist, Rob H Lo, interventional radiologist, Roel J J Heijboer, interventional radiologist, Koos Keizer, neurologist, Maarten Uyttenboogaart, interventional neurologist, Omid Eshghi, interventional radiologist, Marieke J H Wermer, neurologist, Marianne A A van Walderveen, interventional radiologist, Ewoud J van Dijk, neurologist, Hieronymus D Boogaarts, interventional radiologist, Sebastiaan F de Bruijn, neurologist, Lukas C van Dijk, interventional radiologist, Jan S P van den Berg, neurologist, Boudewijn A A M van Hasselt, interventional
radiologist, Paul L M de Kort, neurologist, Jo P P Peluso, interventional radiologist, Tobien H C M L Schreuder, neurologist, Leo A M Aerden, neurologist, René J Dallinga, interventional radiologist, Marieke E S Sprengers, interventional radiologist, Lonneke S F Yo, interventional radiologist, Sjoerd F M Jenniskens, interventional radiologist, Stefan D Roosendaal, interventional radiologist, Bas F W van der Kallen, interventional radiologist, Ido R van den Wijngaard, interventional neurologist, Joost C J Bot, interventional radiologist, Pieter J van Doormaal, interventional radiologist, H Zwenneke Flach, interventional radiologist, Esmee Venema, medical researcher, Hester F Lingsma, senior medical statistician, Ludo F M Beenen, radiologist, Albert J Yoo, interventional radiologist, Jelis Boiten, neurologist, Jan A Vos, interventional radiologist, Yvo B W E M Roos, professor of acute neurology, Robert J van Oostenbrugge, professor of vascular neurology, Aad van der Lugt, professor of neuroradiology and head/ neck radiology, Wim H van Zwam, interventional radiologist, Diederik W J Dippel, professor of neurovascular diseases, Charles B L M Majoie, professor of neuroradiology.  
radiologist, Paul L M de Kort, neurologist, Jo P P Peluso, interventional radiologist, Tobien H C M L Schreuder, neurologist, Leo A M Aerden, neurologist, René J Dallinga, interventional radiologist, Marieke E S Sprengers, interventional radiologist, Lonneke S F Yo, interventional radiologist, Sjoerd F M Jenniskens, interventional radiologist, Stefan D Roosendaal, interventional radiologist, Bas F W van der Kallen, interventional radiologist, Ido R van den Wijngaard, interventional neurologist, Joost C J Bot, interventional radiologist, Pieter J van Doormaal, interventional radiologist, H Zwenneke Flach, interventional radiologist, Esmee Venema, medical researcher, Hester F Lingsma, senior medical statistician, Ludo F M Beenen, radiologist, Albert J Yoo, interventional radiologist, Jelis Boiten, neurologist, Jan A Vos, interventional radiologist, Yvo B W E M Roos, professor of acute neurology, Robert J van Oostenbrugge, professor of vascular neurology, Aad van der Lugt, professor of neuroradiology and head/ neck radiology, Wim H van Zwam, interventional radiologist, Diederik W J Dippel, professor of neurovascular diseases, Charles B L M Majoie, professor of neuroradiology, for the MR CLEAN Registry investigators.
Executive committee: DWJD, AvdL, CBLMM, YBWEMR, RJvO, WHvZ, JB, and JAV; study coordinators: IGHJ, MJHLM, and RBG; local principal investigators: WJS, JAV, CBLMM, JMC, MJHW, MAAvW, JS, WHvZ, JH, JMM, GJLàN, JB, BR BJE, SFdB, LCvD, HBvdW, RHL, EJvD, HDB, PLMdK, JJPP, JSPvdB, BAAMvH, LAMA, RJD, MU, OE, THCMLS, RJJH, KK, LSFY, HMdH, and EJCS; imaging assessment committee: CBLMM (chair), WHvZ, AvdL, GJLàN, MAAvW, MESS, SFMJ, RvdB, AJY, LFMB, SDR, BFWvdK, IRvdW, AvE, BE, JMM, LSFY, JAV, JCJB, and P-JvD; writing committee: DWJD (chair), AvdL, CBLMM, YBWEMR, RJvO, WHvZ, GJLàN, JB, JAV, WJS, JH, JMM, HBvdW, and RHL; adverse event committee: RJvO (chair), JH, and HZF; trial methodologist: HFL.
 
Research nurses/local trial coordinators, based in Departments of Neurology: Naziha el Ghannouti and Martin Sterrenberg, (Erasmus MC University Medical Centre, Rotterdam, Netherlands); Corina Puppels and Wilma Pellikaan (Sint Antonius Hospital, Nieuwegein, Netherlands); Rita Sprengers (Department of Radiology, Academic Medical Centre, Amsterdam, Netherlands); Marjan Elfrink (Rijnstate Hospital, Arnhem, Netherlands); Joke de Meris and Tamara Vermeulen (Haaglanden MC, The Hague, Netherlands); Annet Geerlings (Radboud University Medical Centre, Nijmegen, Netherlands), Gina van Vemde (Isala Klinieken, Zwolle, Netherlands); Tiny Simons (Atrium Medical Centre, Heerlen, Netherlands); Cathelijn van Rijswijk (Sint Elisabeth Hospital, Tilburg, Netherlands); Gert Messchendorp (University Medical Centre Groningen, Groningen, Netherlands); Hester Bongenaar (Catharina Hospital, Eindhoven, Netherlands); Karin Bodde (Reinier de Graaf Gasthuis, Delft, Netherlands); Sandra Kleijn, Jasmijn Lodico, and Hanneke Droste (Medical Spectrum Twente, Enschede, Netherlands); Maureen Wollaert and Daisy Ramakers (Maastricht University Medical Centre and Cardiovascular Research Institute Maastricht (CARIM), Maastricht, Netherlands); Erna Bos (Leiden University Medical Centre, Leiden, Netherlands); Yvonne Drabbe, and Mostafa Khalilzada (HAGA Hospital, The Hague, Netherlands); and Berber Zweedijk (University Medical Centre Utrecht, Utrecht, Netherlands).

PhD/Medical students: Vicky Chalos (Department of Neurology, Erasmus MC University Medical Centre, and Public Health, Erasmus MC University Medical Centre, Rotterdam, Netherlands); Kars J Compagne (Department of Radiology, Erasmus MC University Medical Centre, Rotterdam, Netherlands); Ralph R Geuskens (Department of Radiology, Academic Medical Centre, Amsterdam, Netherlands); Tim van Straaten (Department of Neurology, Radboud University Medical Centre, Nijmegen, Netherlands); Saliha Ergezen, Roger RM Harmsma, Daan Muijres, and Anouk de Jong (Department of Neurology, Erasmus MC University Medical Centre, Rotterdam, Netherlands); Wouter Hinseveld (Department of Neurology, Sint Antonius Hospital, Nieuwegein, Netherlands); Olvert A Berkhemer (Department of Neurology, Erasmus MC University Medical Centre, Rotterdam, Netherlands, and Department of Radiology, Academic Medical Centre, Amsterdam, Netherlands); Anna MM Boers (Department of Radiology, and Department of Biomedical Engineering and Physics, Academic Medical Centre, Amsterdam, Netherlands); J Huguet, Paul FC Groot, Marieke A Mens, Katinka R van Kranendonk, Kilian M Treurniet, Manon Kappelhof, Manon L Tolhuijsen, and Heitor Alves (Department of Radiology, Academic Medical Centre, Amsterdam, Netherlands).
