# Supplementary material
Source: HighWire-hosted journal article supplement (https://jnis.bmj.com/content/neurintsurg-2018-014270)
Supplement: inline-supplementary-material-2 [file inline-supplementary-material-2.docx]

| Intervention center | Aspiration  N = 207 | Stent retriever  N = 968 | Total |
| --- | --- | --- | --- |
| 0 | 12 | 111 | 123 |
| 1 | 10 | 146 | 156 |
| 2 | 14 | 87 | 101 |
| 3 | 9 | 142 | 151 |
| 4 | 9 | 8 | 17 |
| 5 | 0 | 18 | 18 |
| 6 | 1 | 30 | 31 |
| 7 | 3 | 36 | 39 |
| 8 | 1 | 85 | 86 |
| 9 | 18 | 17 | 35 |
| 10 | 0 | 13 | 13 |
| 11 | 35 | 36 | 71 |
| 12 | 9 | 75 | 84 |
| 13 | 82 | 27 | 109 |
| 14 | 3 | 18 | 21 |
| 15 | 0 | 64 | 64 |
| 16 | 1 | 55 | 56 |

**Table 3.** Distribution of aspiration and stent retriever method as first choice among the multiple centres.
